# Supplementary material for: Stress- and metabolic responses of Candida albicans require Tor1 kinase N-terminal HEAT repeats
Source: PubMed Central journal article supplement (PMC9223334; doi:10.1371/journal.ppat.1010089), 2022-06-10
Supplement: ppat.1010089.s002.pdf [file ppat.1010089.s002.pdf]

## Supplementary Text

### Tables

| Supp. Table Number | Content                       |
|--------------------|-------------------------------|
| A                  | Strains used in this study    |
| B                  | Plasmids used in this study   |
| C                  | Oligos used in this study     |
| D                  | Antibodies used in this study |

**Table A. *C. albicans* strains used in this study.**

| <b><i>C. albicans</i> strain name</b> | <b>Parent</b> | <b>Genotype</b>                                                                                                                                                          | <b>Strain background /construction</b>                                                                                                              | <b>Reference</b> |
|---------------------------------------|---------------|--------------------------------------------------------------------------------------------------------------------------------------------------------------------------|-----------------------------------------------------------------------------------------------------------------------------------------------------|------------------|
| SC5314                                |               | Wild type                                                                                                                                                                |                                                                                                                                                     | [1]              |
| SN95                                  |               | <i>arg4Δ/arg4Δ his1Δ/his1Δ IRO1/iro1Δ::λimm<sup>434</sup> URA3/ura3Δ::λimm<sup>434</sup></i>                                                                             |                                                                                                                                                     | [2]              |
| JKC917                                | SN95          | <i>hisΔ1/his1Δ::tetR-FRT arg4/arg4 IRO1/iro1Δ::λimm<sup>434</sup> URA3/ura3Δ::λimm<sup>434</sup></i>                                                                     |                                                                                                                                                     | [3]              |
| JKC1361                               | JKC917        | <i>hisΔ1/his1Δ::tetR-FRT arg4/ARG4 IRO1/iro1Δ::λimm<sup>434</sup> URA3/ura3Δ::λimm<sup>434</sup></i>                                                                     | JKC917 transformed with PCR product of <i>fjk1184</i> & <i>rjk1186</i> using <i>Candida</i> cDNA library as template                                | [3]              |
| JKC1713                               | JKC917        | <i>hisΔ1/his1Δ::tetR-FRT arg4/ARG4 IRO1/iro1Δ::λimm<sup>434</sup> URA3/ura3Δ::λimm<sup>434</sup></i>                                                                     | JKC917 transformed with PCR product of <i>fjk1184</i> & <i>rjk1186</i> using <i>Candida</i> cDNA library as template                                | This work        |
| JKC1347                               | JKC917        | <i>tor1::ARG4/TOR1 hisΔ1/his1Δ::tetR-FRT arg4/arg4 IRO1/iro1Δ::λimm<sup>434</sup> URA3/ura3Δ::λimm<sup>434</sup></i>                                                     | JKC917 transformed with PCR product of <i>fjk1142</i> & <i>rjk1143</i> using pFA-ARG4 as template                                                   | [3]              |
| JKC1345                               | JKC917        | <i>tor1::ARG4/TOR1 hisΔ1/his1Δ::tetR-FRT arg4/arg4 IRO1/iro1Δ::λimm<sup>434</sup> URA3/ura3Δ::λimm<sup>434</sup></i>                                                     | <i>tor1/TOR1</i> heterozygote constructed like JKC1347, independent isolate.                                                                        | This work        |
| JKC1346                               | JKC917        | <i>tor1::ARG4/TOR1 hisΔ1/his1Δ::tetR-FRT arg4/arg4 IRO1/iro1Δ::λimm<sup>434</sup> URA3/ura3Δ::λimm<sup>434</sup></i>                                                     | <i>tor1/TOR1</i> heterozygote constructed like JKC1347, independent isolate.                                                                        | This work        |
| JKC1441                               | JKC1347       | <i>tor1::ARG4/tor1::FRT-tetO-TOR1-Del381 hisΔ1/his1Δ::tetR-FRT arg4/arg4 IRO1/iro1Δ::λimm<sup>434</sup> URA3/ura3Δ::λimm<sup>434</sup></i>                               | JKC1347 transformed with <i>StuI/NcoI</i> digested pJK1189 to have <i>TOR1-Del381</i> under <i>tetO</i> ( <i>OFF</i> ) promoter, after inducing FLP | [3]              |
| JKC1442                               | JKC1345       | <i>tor1::ARG4/tor1::FRT-tetO-TOR1-Del381 hisΔ1/his1Δ::tetR-FRT arg4/arg4 IRO1/iro1Δ::λimm<sup>434</sup> URA3/ura3Δ::λimm<sup>434</sup></i>                               | <i>tor1/tetO-TOR1-Del381</i> constructed like JKC1441, distinct lineage from JKC1345.                                                               | This work        |
| JKC1445                               | JKC1346       | <i>tor1::ARG4/tor1::FRT-tetO-TOR1-Del381 hisΔ1/his1Δ::tetR-FRT arg4/arg4 IRO1/iro1Δ::λimm<sup>434</sup> URA3/ura3Δ::λimm<sup>434</sup></i>                               | <i>tor1/tetO-TOR1-Del381</i> constructed like JKC1441, distinct lineage from JKC1346.                                                               | This work        |
| JKC1549                               | JKC1347       | <i>tor1::ARG4/tor1::FRT-tetO-TOR1-FL hisΔ1/his1Δ::tetR-FRT arg4/arg4 IRO1/iro1Δ::λimm<sup>434</sup> URA3/ura3Δ::λimm<sup>434</sup></i>                                   | JKC1347 transformed with <i>StuI/NcoI</i> digested pJK1236 to have <i>TOR1-FL</i> under <i>tetO</i> ( <i>OFF</i> ) promoter, after inducing FLP     | [3]              |
| JKC1543                               | JKC1345       | <i>tor1::ARG4/tor1::FRT-tetO-TOR1-FL hisΔ1/his1Δ::tetR-FRT arg4/arg4 IRO1/iro1Δ::λimm<sup>434</sup> URA3/ura3Δ::λimm<sup>434</sup></i>                                   | <i>tor1/tetO-TOR1-FL</i> constructed like JKC1549, distinct lineage from JKC1345.                                                                   | This work        |
| JKC1546                               | JKC1346       | <i>tor1::ARG4/tor1::FRT-tetO-TOR1-FL hisΔ1/his1Δ::tetR-FRT arg4/arg4 IRO1/iro1Δ::λimm<sup>434</sup> URA3/ura3Δ::λimm<sup>434</sup></i>                                   | <i>tor1/tetO-TOR1-FL</i> constructed like JKC1549, distinct lineage from JKC1346.                                                                   | This work        |
| TETG25B                               | CAI4          | <i>ADH1/adh1::tetO(ON)-GFP</i>                                                                                                                                           | CAI4 transformed with pTET25 tetracycline inducible GFP cassette                                                                                    | [4]              |
| JKC2616                               | JKC1713       | <i>hisΔ1/his1Δ::tetR-FRT arg4/ARG4 MAL2/pMAL2-GFP-FRT-pMAL2-MAL2 IRO1/iro1Δ::λimm<sup>434</sup> URA3/ura3Δ::λimm<sup>434</sup></i>                                       | JKC1713 transformed with <i>BsrGI</i> digested pJK1489 to have GFP under <i>pMAL2</i> promoter, after inducing FLP                                  | This work        |
| JKC2620                               | JKC1347       | <i>tor1::ARG4/tor1::FRT-tetO-TOR1-Del381 hisΔ1/his1Δ::tetR-FRT arg4/arg4 MAL2/pMAL2-GFP-FRT-pMAL2-MAL2 IRO1/iro1Δ::λimm<sup>434</sup> URA3/ura3Δ::λimm<sup>434</sup></i> | JKC1347 transformed with <i>BsrGI</i> digested pJK1489 to have GFP under <i>pMAL2</i> promoter, after inducing FLP                                  | This work        |
| JKC2624                               | JKC1441       | <i>tor1::ARG4/tor1::FRT-tetO-TOR1-Del381 hisΔ1/his1Δ::tetR-FRT arg4/arg4 MAL2/pMAL2-GFP-FRT-pMAL2-MAL2 IRO1/iro1Δ::λimm<sup>434</sup> URA3/ura3Δ::λimm<sup>434</sup></i> | JKC1441 transformed with <i>BsrGI</i> digested pJK1489 to have GFP under <i>pMAL2</i> promoter, after inducing FLP                                  | This work        |
| JKC2628                               | JKC1549       | <i>tor1::ARG4/tor1::FRT-tetO-TOR1-FL hisΔ1/his1Δ::tetR-FRT arg4/arg4 MAL2/pMAL2-GFP-FRT-pMAL2-MAL2 IRO1/iro1Δ::λimm<sup>434</sup> URA3/ura3Δ::λimm<sup>434</sup></i>     | JKC1549 transformed with <i>BsrGI</i> digested pJK1489 to have GFP under <i>pMAL2</i> promoter, after inducing FLP                                  | This work        |

**Table B. Plasmids used in this study.**

| Plasmid   | Description                                                                                                                                                           | Source (Reference) |
|-----------|-----------------------------------------------------------------------------------------------------------------------------------------------------------------------|--------------------|
| pJK1000   | <i>FLP-NAT1 tetO-PES1</i> construct, vector backbone is pLitmus28 (New England Biolabs)                                                                               | [5]                |
| pJK1027   | pAU34 with <i>URA3</i> disrupted by <i>Ag<sub>promoter</sub>TEF1-NAT1-Ag<sub>terminator</sub>TEF1</i>                                                                 | [6,7]              |
| pJK1189   | <i>FLP-NAT1 tetO-TOR1-Del381</i> construct, derived from pJK1000.                                                                                                     | [3]                |
| pJK1236   | <i>FLP-NAT1 tetO-TOR1-FL</i> construct, derived from pJK1000.                                                                                                         | [3]                |
| pAU15     | <i>pMAL2</i> expression vector                                                                                                                                        | [6]                |
| pGFP-HIS1 | <i>GFP-HIS1</i> fusion construct                                                                                                                                      | [8]                |
| pJK1482   | <i>pMAL2-GFP</i> construct, derived from pAU15. Product of fjk2036 & rjk1633 using pGFP- <i>HIS1</i> as template was ligated into pAU15 using <i>Sall/XmaI</i> sites. | This work          |
| pJK1489   | <i>FLP-NAT1 pMAL2-GFP</i> construct, derived from pJK1482. <i>URA3</i> marker in pJK1482 was replaced with the ' <i>FLP-NAT1</i> ' cassette by blunt cloning.         | This work          |

**Table C. Oligonucleotides used in this study.**

| Primer name | Purpose                                                                                                                   | Sequence 5' to 3'<br>(lower cases - restriction enzyme recognition sites) |
|-------------|---------------------------------------------------------------------------------------------------------------------------|---------------------------------------------------------------------------|
| fjk2062     | Forward primer for <i>TOR1</i> quantitative real-time PCR                                                                 | GCTTAGTTTTATCAGGCAAGGGA                                                   |
| rjk2063     | Reverse primer for <i>TOR1</i> quantitative real-time PCR                                                                 | ACTCATCCCCGTGTCTCTAG                                                      |
| fjk1400     | Forward primer for <i>ACT1</i> quantitative real-time PCR                                                                 | TGGTGATGGTGTACTCACG                                                       |
| rjk1401     | Reverse primer for <i>ACT1</i> quantitative real-time PCR                                                                 | GACAATTTCTCTTTCAGCAC                                                      |
| fjk1184     | Forward primer to amplify the <i>ARG4</i> marker                                                                          | GAATCCACAATCGTATATGAAC                                                    |
| rjk1186     | Reverse primer to amplify the <i>ARG4</i> marker                                                                          | GAATATAGTGATGATGAGGATG                                                    |
| fjk1185     | Forward primer to confirm the 5'end integration of <i>ARG4</i> marker in <i>Candida</i> strains.                          | GACATATTGACCGACATAATTC                                                    |
| rjk1187     | Reverse primer to confirm the 5'end integration of <i>ARG4</i> marker in <i>Candida</i> strains                           | GTCGTTTCACCGGTGCCACTG                                                     |
| fjk1188     | Forward primer to confirm the 3'end integration of <i>ARG4</i> marker in <i>Candida</i> strains                           | CAGTACCACCAATAGCATCTC                                                     |
| rjk1199     | Reverse primer to confirm the 3'end integration of <i>ARG4</i> marker in <i>Candida</i> strains                           | GGTAGTCTCCGATTATGATTC                                                     |
| fjk2036     | Forward primer to amplify GFP sequence.                                                                                   | CCTGCTgtcgacATGTCTAAAGGTGAAGAATTAT                                        |
| rjk1633     | Reverse primer to amplify GFP sequence and to confirm the 5'end integration of <i>pMAL2-GFP</i> in <i>Candida</i> strains | GCAGCTcccgggTTATTTGTATAATTCATCCATACCATGG                                  |
| fjk2045     | Forward primer to confirm the 5'end integration of <i>pMAL2-GFP</i> in <i>Candida</i> strains                             | CATTGTGTTGAGCTGCGACT                                                      |
| fjk1517     | Forward primer to confirm the 3'end integration of <i>pMAL2-GFP</i> in <i>Candida</i> strains                             | GGAATTGTGAGCGGATAAC                                                       |
| rjk2046     | Reverse primer to confirm the 3'end integration of <i>pMAL2-GFP</i> in <i>Candida</i> strains                             | CAAGGTCCCGTATTTGCTGT                                                      |

**Table D. Antibodies used in this study.**

| Purpose         | Antigen recognized | Species | Source or Reference                |
|-----------------|--------------------|---------|------------------------------------|
| primary         | P-Mkc1             | rabbit  | Cell Signaling Technology, #4370P  |
| primary         | P-S6               | rabbit  | Cell Signaling Technology, #9611L  |
| primary         | S6                 | sheep   | R&D Systems, #AF5436               |
| primary         | P-Hog1             | rabbit  | Cell Signaling Technology, #4511S  |
| primary         | P-eIF2a            | rabbit  | Cell Signaling Technology, #3597S  |
| primary         | GFP                | mouse   | Roche, #11814460001                |
| loading control | PSTAIRES (Cdc2)    | rabbit  | Santa Cruz Biotechnology, #sc-53   |
| loading control | Tubulin            | rat     | Abcam, #ab6161                     |
| secondary       | Rabbit IgG         | goat    | Cell Signaling Technology, #7074S  |
| secondary       | Sheep IgG          | donkey  | Santa Cruz Biotechnology, #sc-2473 |
| secondary       | Mouse IgG          | horse   | Cell Signaling Technology, #7076S  |
| secondary       | Rat IgG            | goat    | Abcam, #ab97057                    |

**Reference:**

1. Fonzi WQ & Irwin MY. Isogenic strain construction and gene mapping in *Candida albicans*. *Genetics*. 1993;134(3):717-728.
2. Noble SM & Johnson AD. Strains and strategies for large-scale gene deletion studies of the diploid human fungal pathogen *Candida albicans*. *Eukaryotic Cell*. 2005;4(2):298-309.
3. Liu NN, Flanagan PR, Zeng J, Jani NM, Cardenas ME, Moran GP, et al. Phosphate is the third nutrient monitored by TOR in *Candida albicans* and provides a target for fungal-specific indirect TOR inhibition. *Proc Natl Acad Sci U S A*. 2017;114(24):6346-51. doi: 10.1073/pnas.1617799114. PubMed PMID: 28566496; PubMed Central PMCID: PMC5474788.
4. Park YN & Morschhäuser J. Tetracycline-inducible gene expression and gene deletion in *Candida albicans*. *Eukaryotic Cell*. 2005;4(8):1328-1342.
5. Shen J, Cowen LE, Griffin AM, Chan L, Köhler JR. The *Candida albicans* pescadillo homolog is required for normal hypha-to-yeast morphogenesis and yeast proliferation. *Proc Natl Acad Sci U S A*. 2008;105(52):20918-23. Epub 2008/12/17. doi: 10.1073/pnas.0809147105. PubMed PMID: 19075239; PubMed Central PMCID: PMC2634893.
6. Uhl MA & Johnson AD. Development of *Streptococcus thermophilus* lacZ as a reporter gene for *Candida albicans*. *Microbiology*. 2001;147(Pt 5):1189-1195.
7. Patenaude C, Zhang Y, Cormack B, Köhler J, Rao R. Essential role for vacuolar acidification in *Candida albicans* virulence. *The Journal of Biological Chemistry*. 2013;288(36):26256-26264.
8. Gerami-Nejad M, Berman J, Gale CA. Cassettes for PCR-mediated construction of green, yellow, and cyan fluorescent protein fusions in *Candida albicans*. *Yeast*. 2001;18(9):859-864.
